# Supplementary material for: An efficient renewable-derived surfactant for aqueous esterification reactions
Source: Royal Society of Chemistry journal article supplement (doi:10.1039/c3ra45757e), 2013-12-13

## **Towards biodiesel-like biofuels: an efficient renewable-derived surfactant for aqueous esterification reactions**

Fatemeh Rajabi<sup>a\*</sup> and Rafael Luque<sup>b,c</sup>

<sup>a</sup> *Department of Science, Payame Noor University, P. O. Box: 19395-4697, Tehran, Iran. E-mail: f\_rajabi@pnu.ac.ir; Fax: +982813344081; Tel: +982813366366*

<sup>b</sup> *Departamento de Química Orgánica, Universidad de Córdoba, Edificio Marie Curie (C-3), Campus de Excelencia Agroalimentario CeIA3, Ctra Nnal IV-A, Km 396, E14014, Córdoba (Spain), e-mail: q62alsor@uco.es*

<sup>c</sup> *Department of Chemical and Biomolecular Engineering (CBME), Hong Kong University of Science and Technology (HKUST), Clear Water Bay, Kowloon, Hong Kong, rafaluque@ust.hk*

### **Table of Contents**

|                                                   |     |
|---------------------------------------------------|-----|
| 1. <sup>1</sup> H and <sup>13</sup> C NMR spectra | 2-8 |
|---------------------------------------------------|-----|

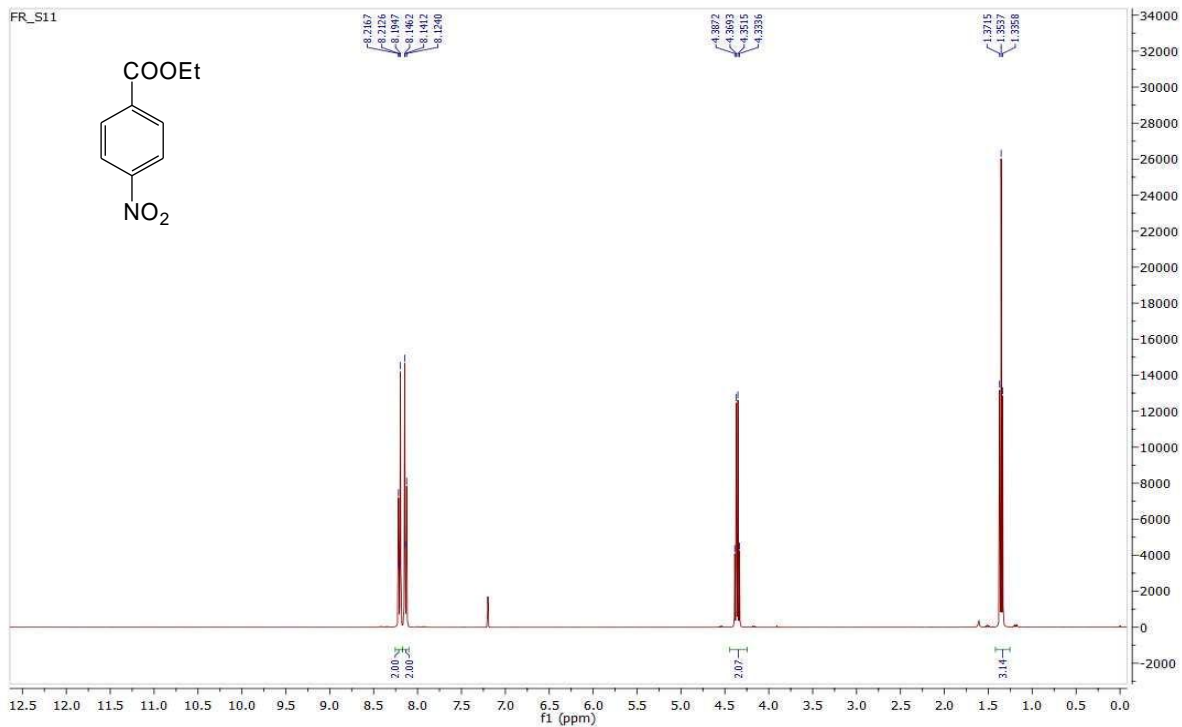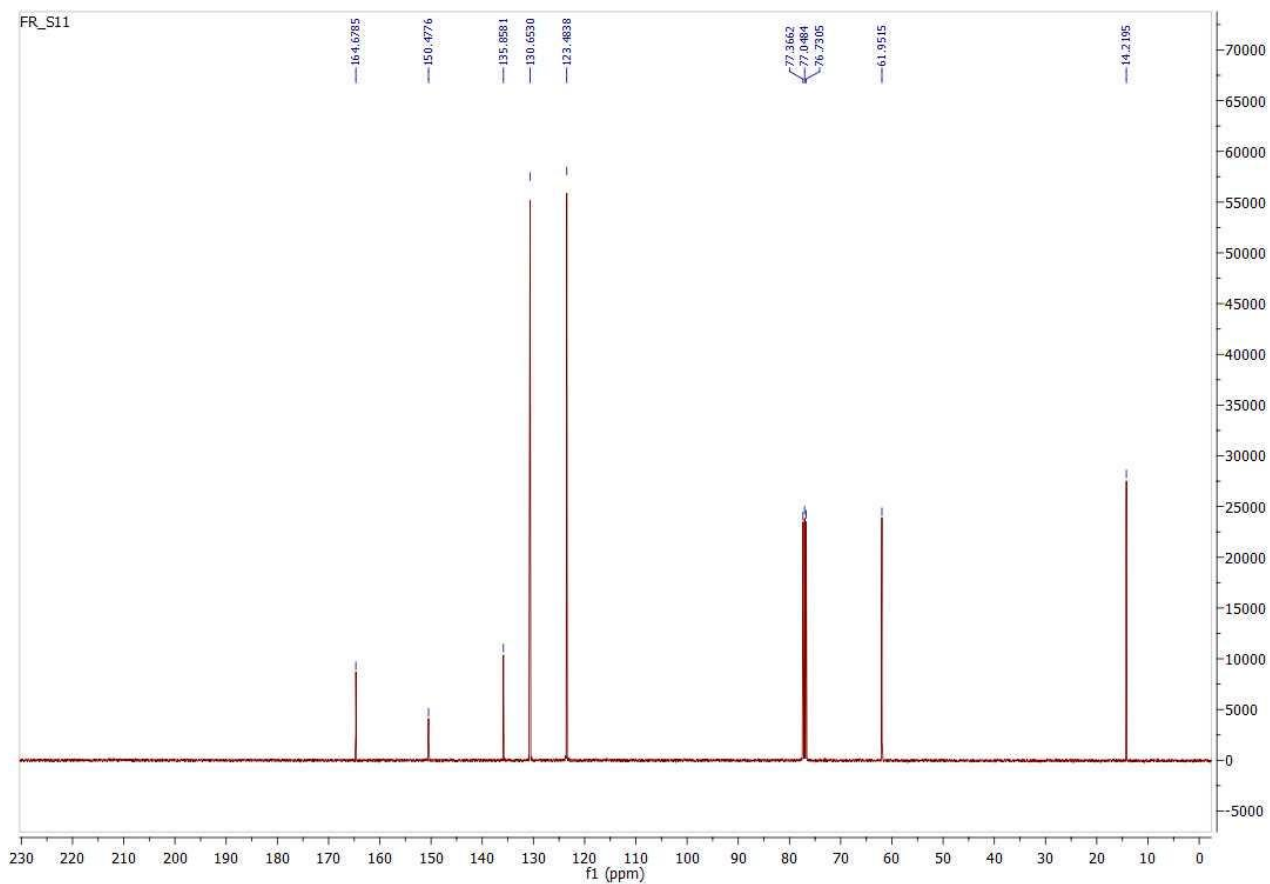

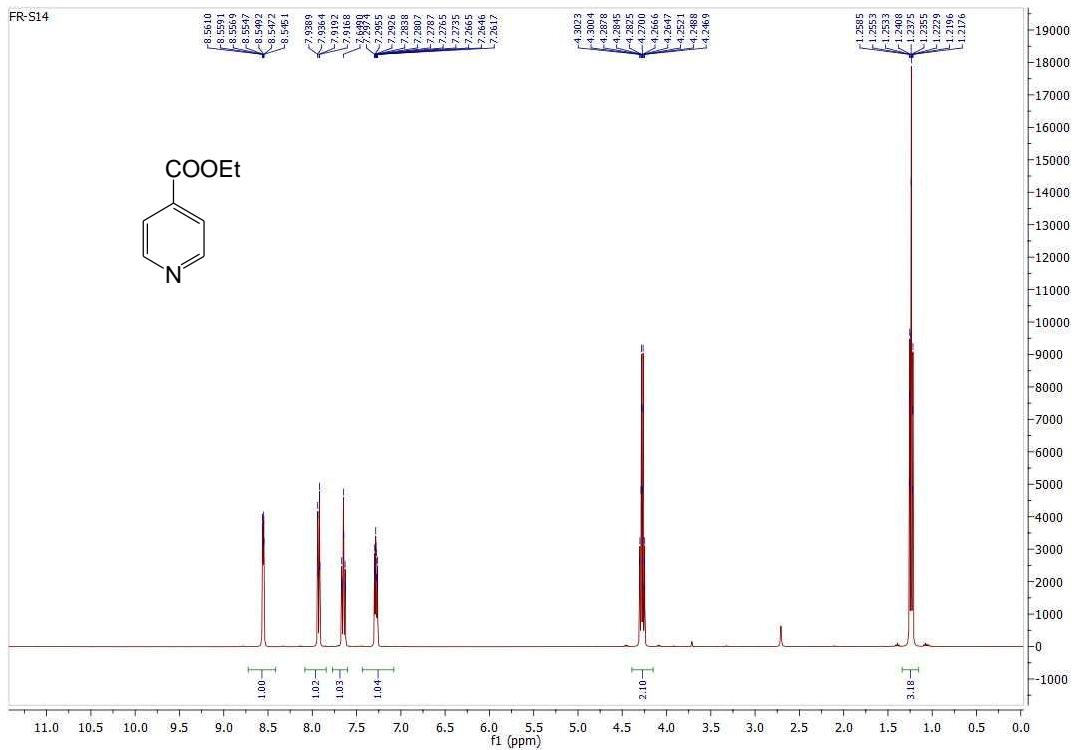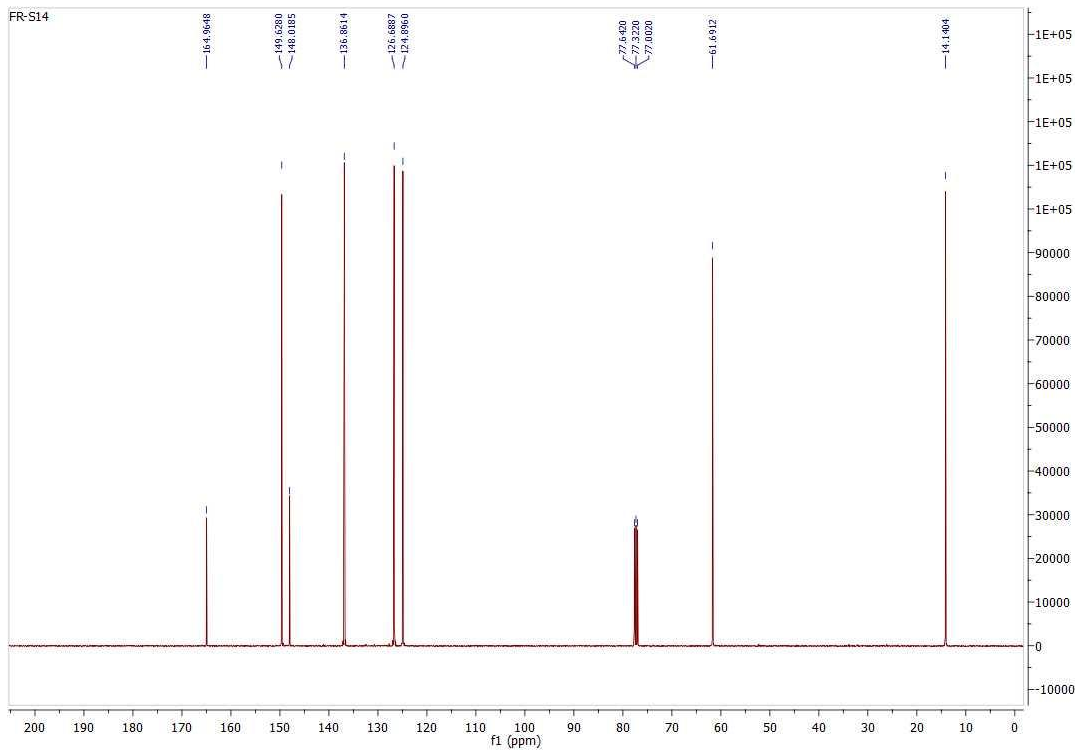

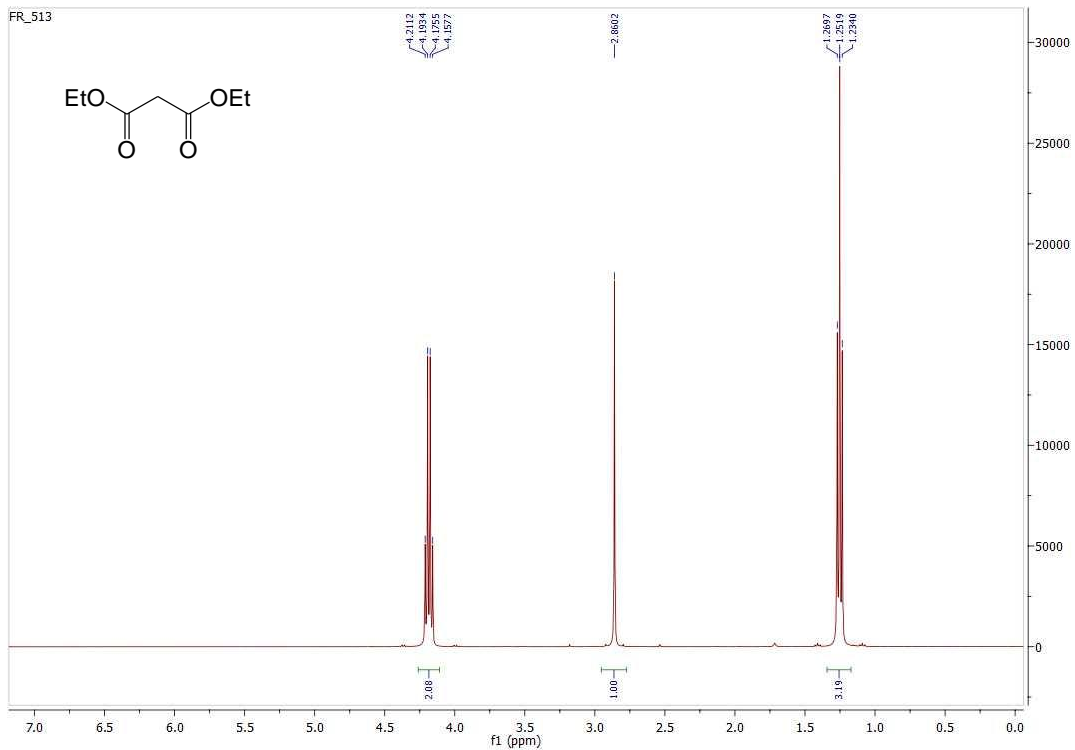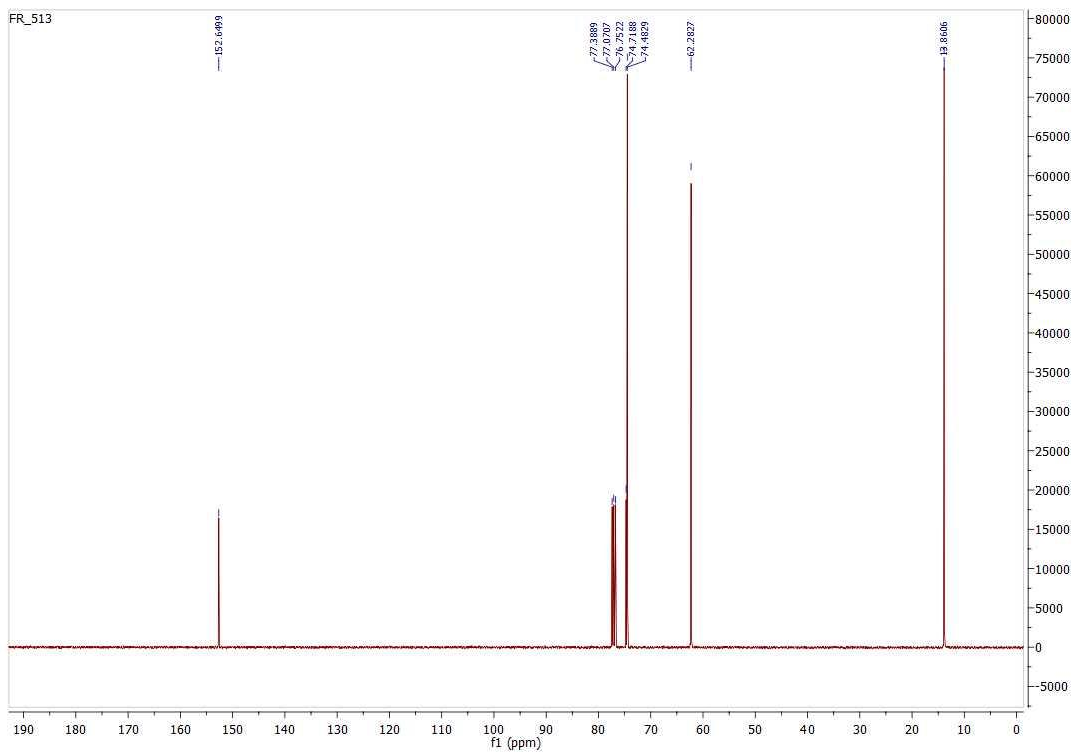

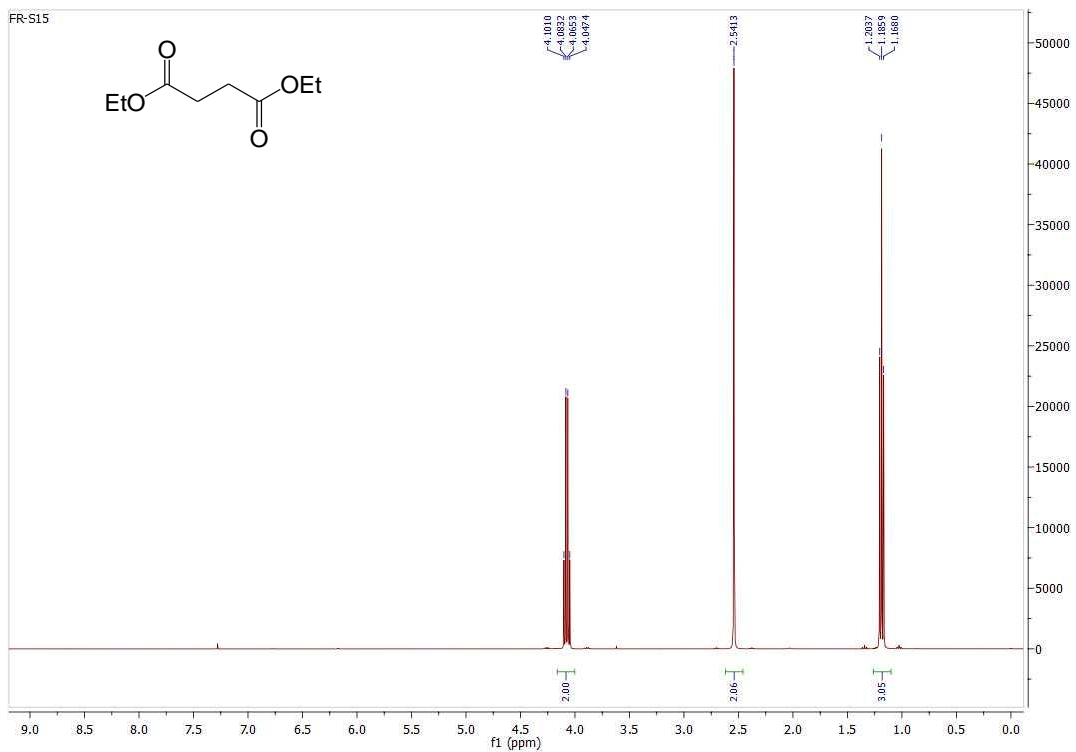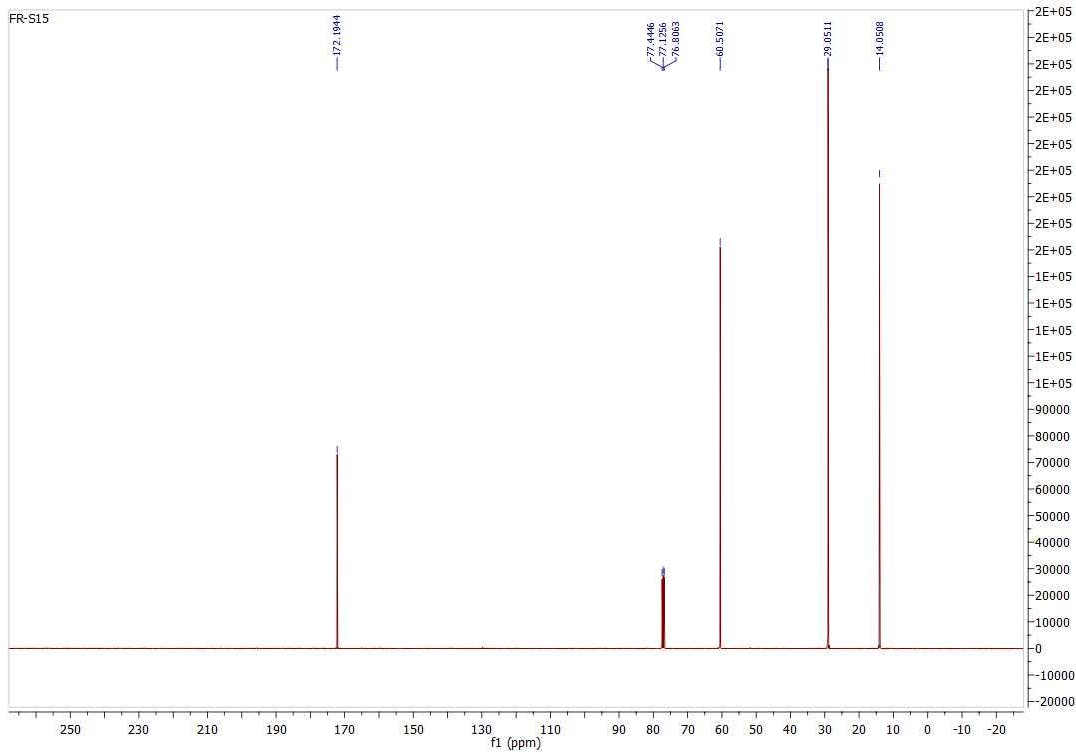

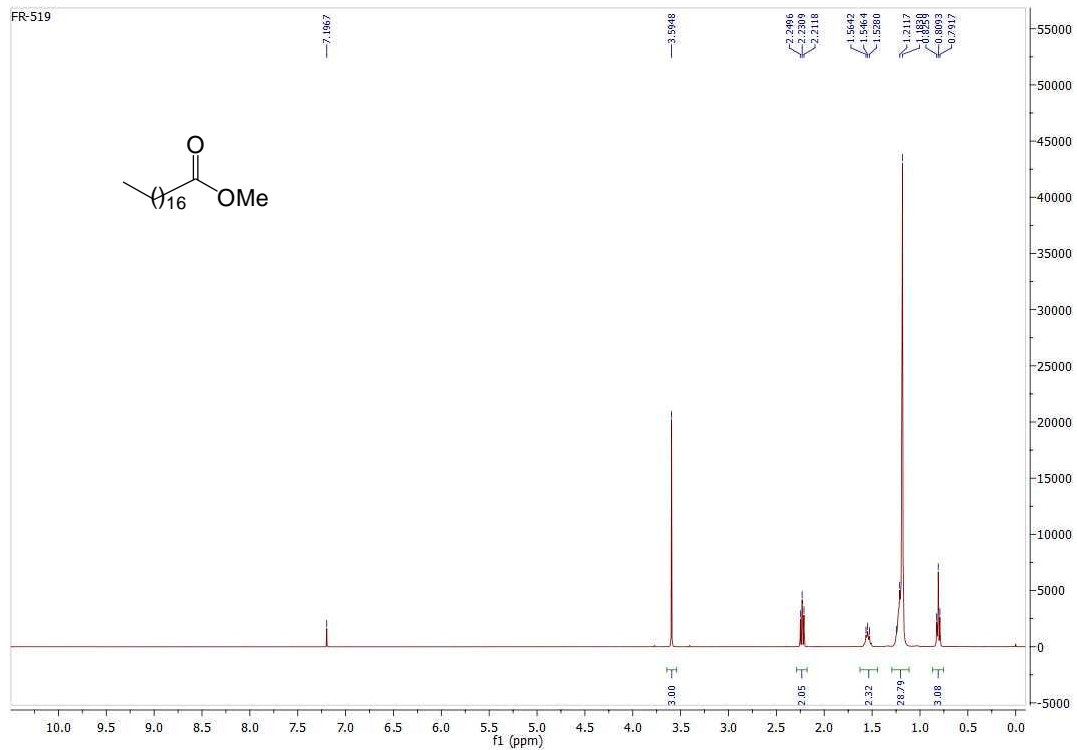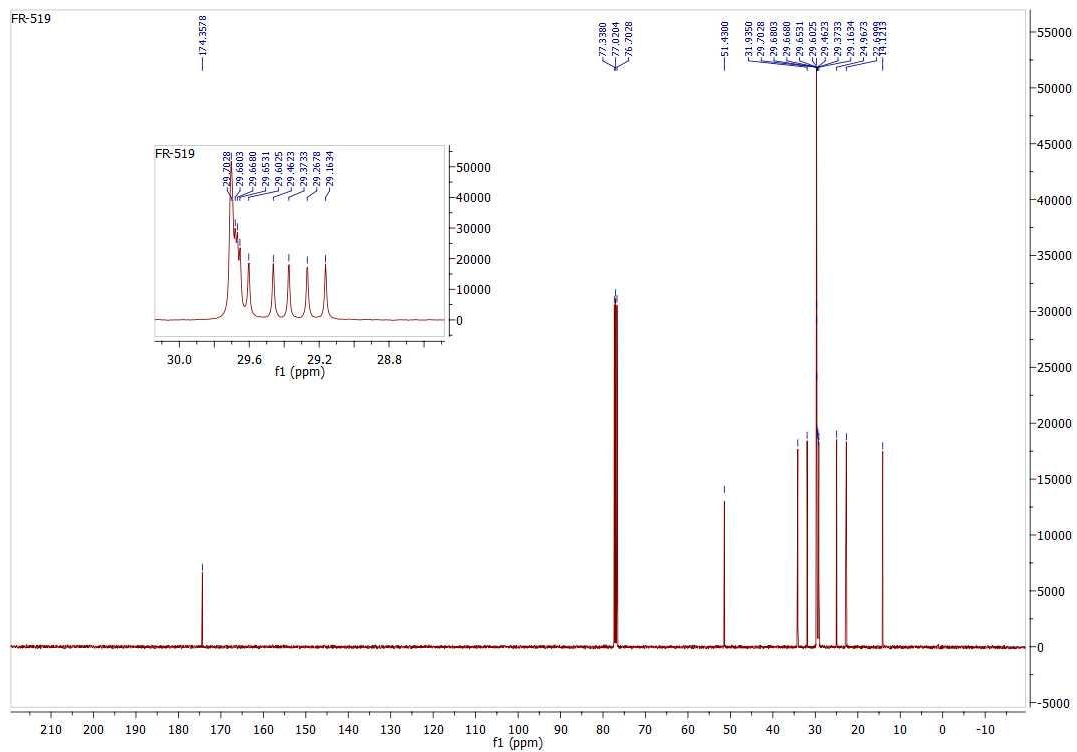

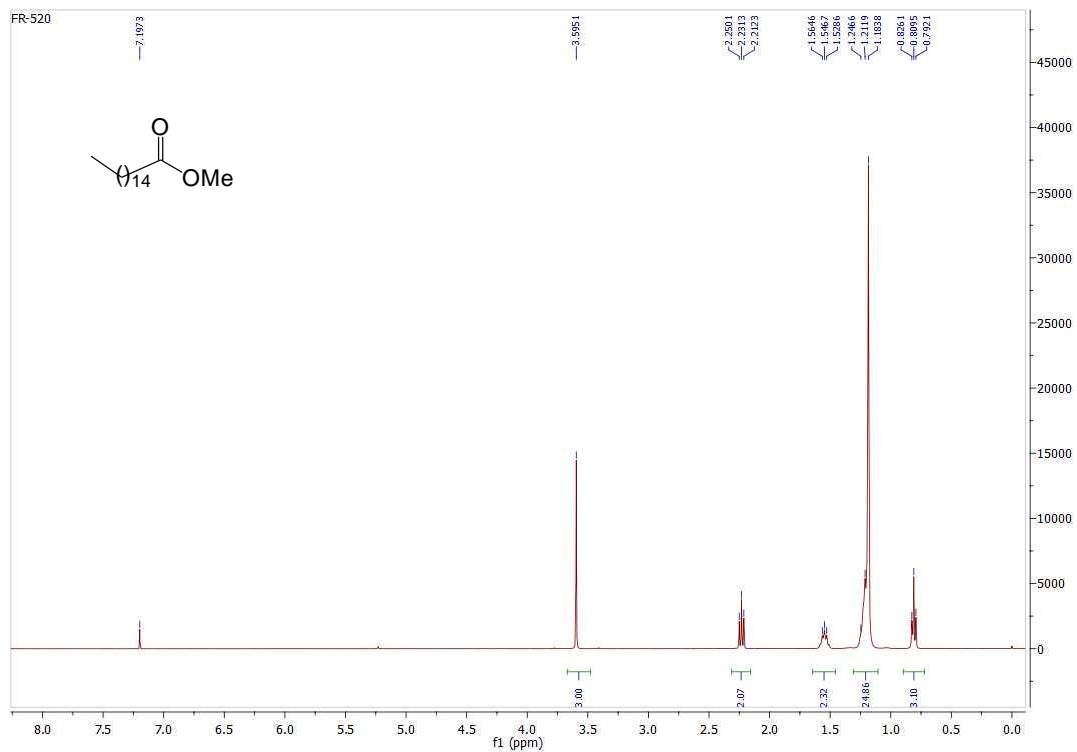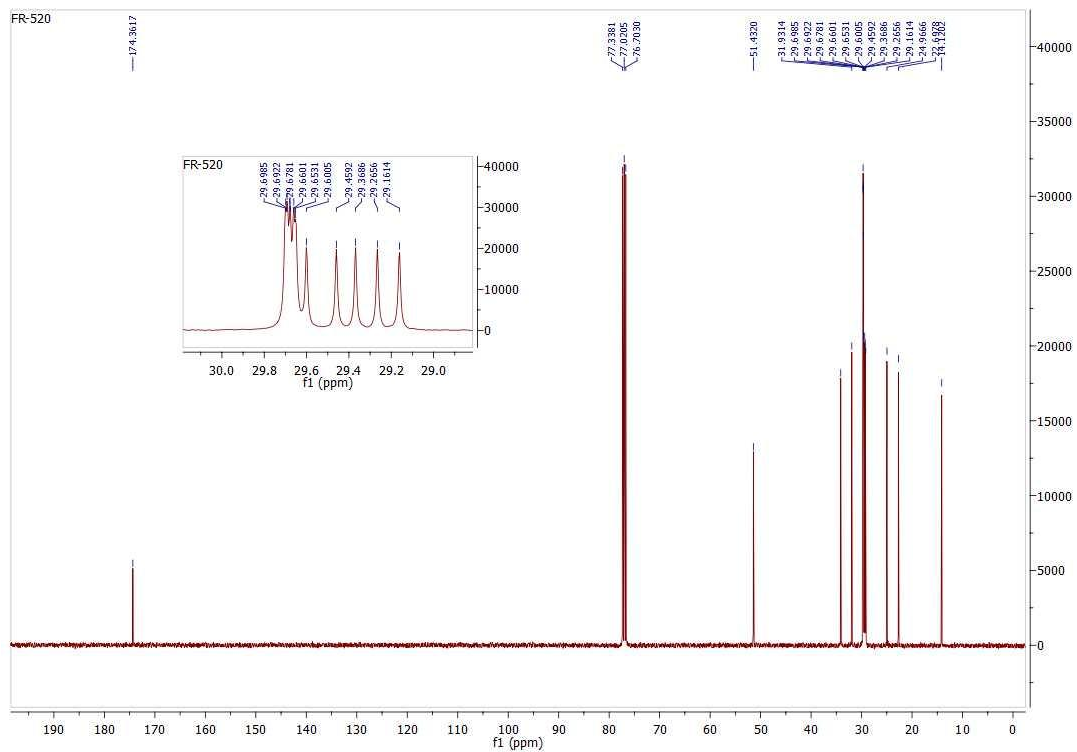

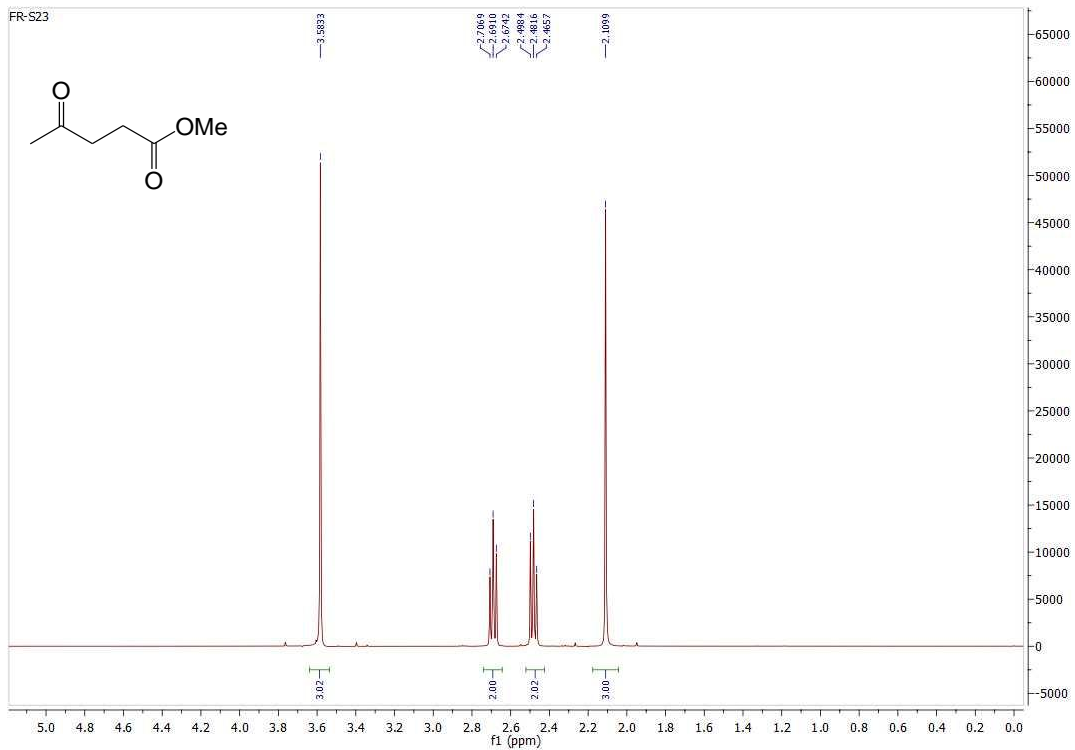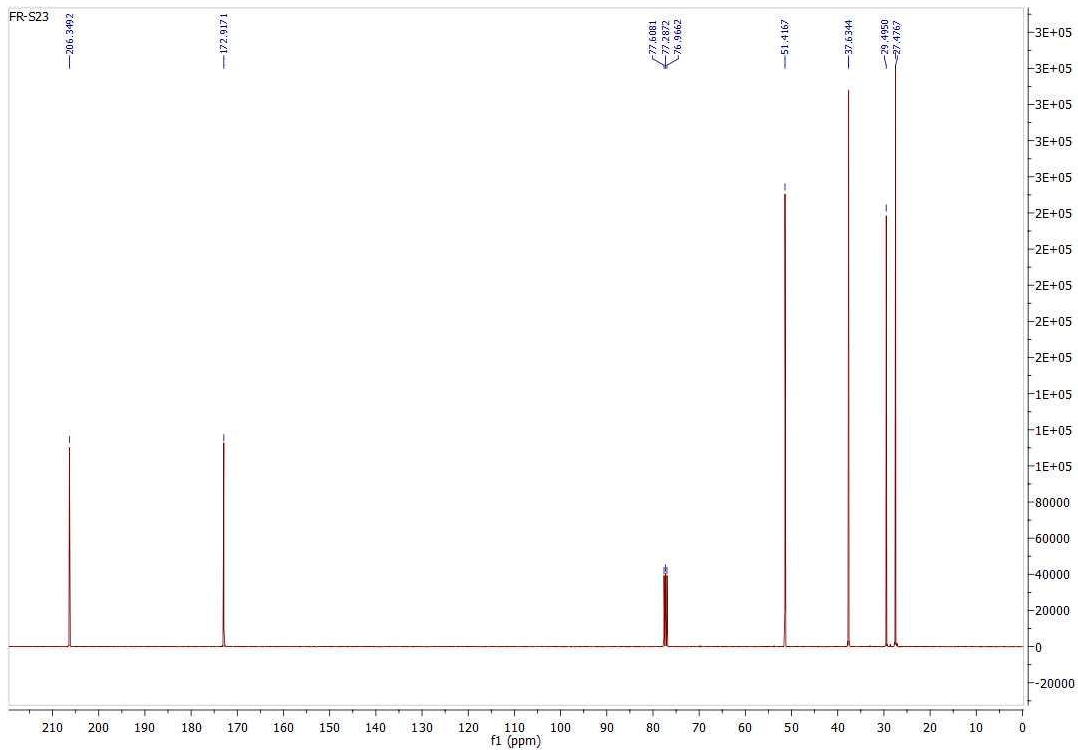

Supplement: c3ra45757e.pdf [file c3ra45757e.pdf]
